# Supplementary material for: Recognizing flu-like symptoms from videos
Source: Springer Nature journal article supplement (doi:10.1186/1471-2105-15-300), 2014-09-12

# Detection and tracking

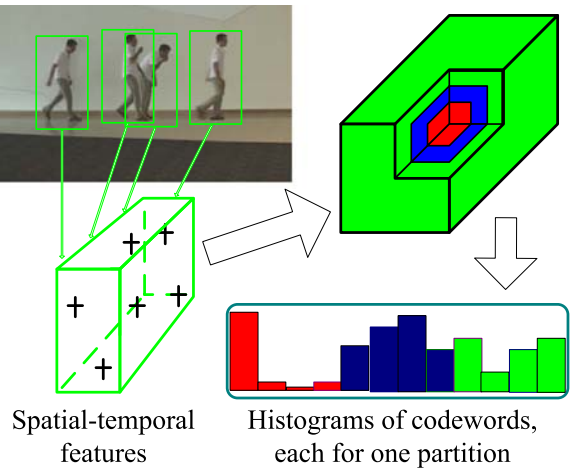

(a)

# Partitions

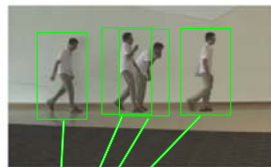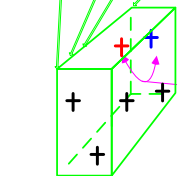

(b)

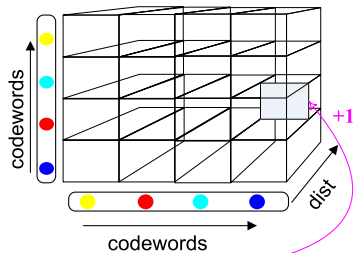

Supplement: 12859_2013_6588_MOESM1_ESM.pdf [file 12859_2013_6588_MOESM1_ESM.pdf]
