# Supplementary material for: Recognizing flu-like symptoms from videos
Source: Springer Nature journal article supplement (doi:10.1186/1471-2105-15-300), 2014-09-12

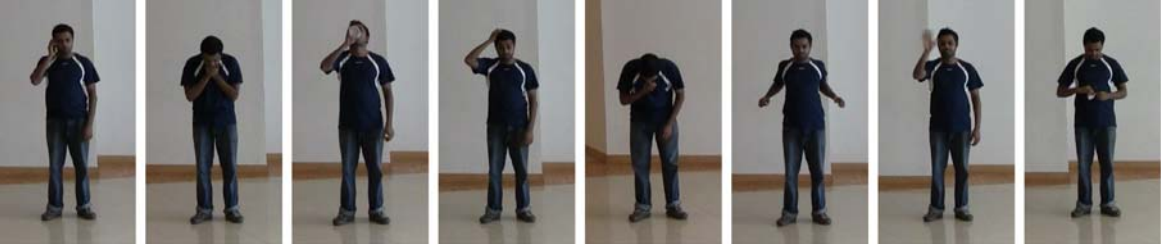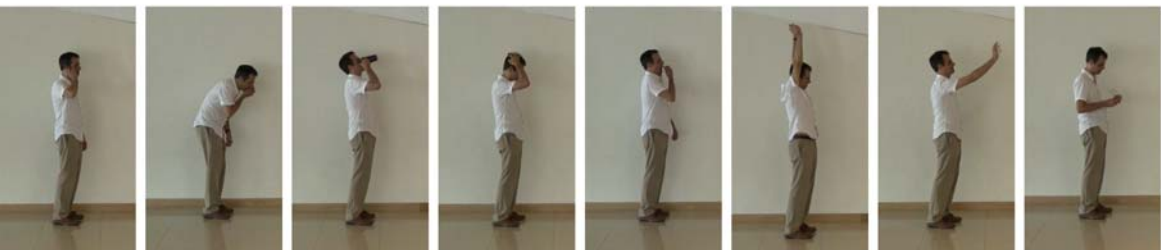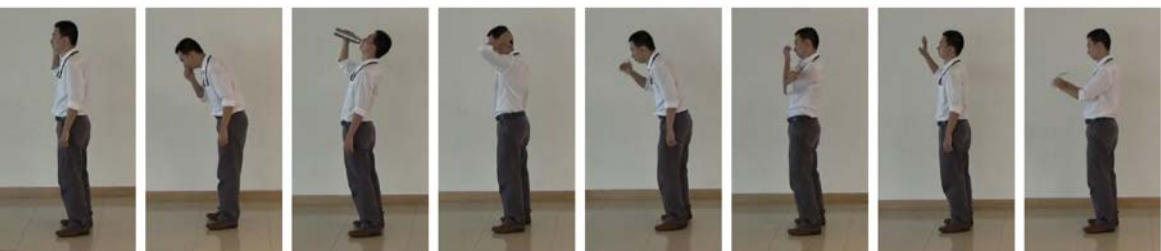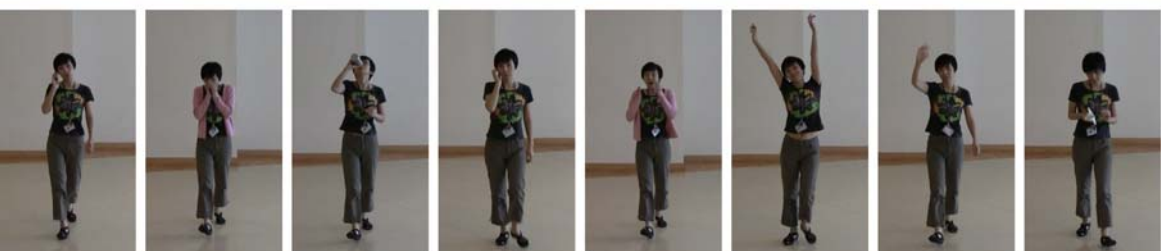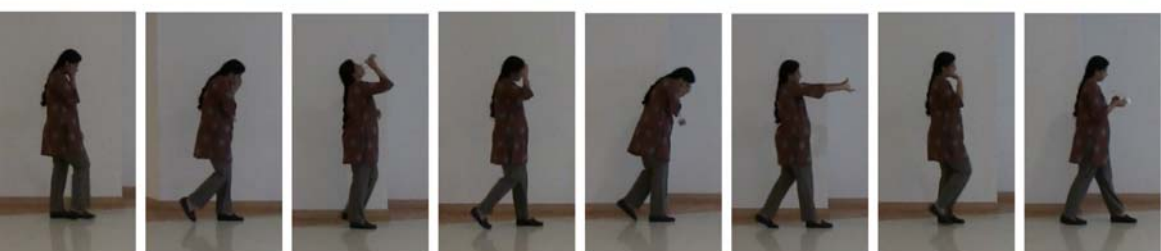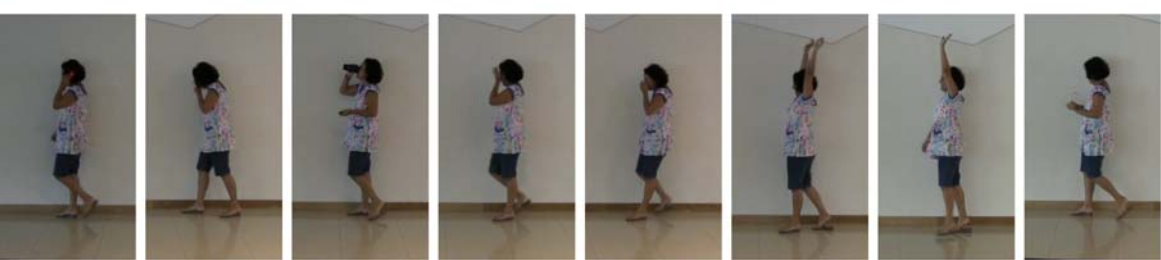

Supplement: 12859_2013_6588_MOESM3_ESM.pdf [file 12859_2013_6588_MOESM3_ESM.pdf]
