# Supplementary material for: Recognizing flu-like symptoms from videos
Source: Springer Nature journal article supplement (doi:10.1186/1471-2105-15-300), 2014-09-12
Supplement: 12859_2013_6588_MOESM4_ESM.pdf [file 12859_2013_6588_MOESM4_ESM.pdf]

|         |    |    |    |    |    |    |    |    |
|---------|----|----|----|----|----|----|----|----|
| call    | 41 | 12 | 27 | 03 | 07 | 02 | 03 | 05 |
| cough   | 01 | 63 | 02 | 02 | 22 | 03 | 04 | 03 |
| drink   | 16 | 03 | 62 | 02 | 01 | 00 | 02 | 14 |
| scratch | 17 | 08 | 06 | 39 | 08 | 06 | 14 | 02 |
| sneeze  | 13 | 02 | 16 | 25 | 36 | 02 | 05 | 01 |
| stretch | 02 | 04 | 06 | 09 | 09 | 57 | 03 | 10 |
| wave    | 03 | 12 | 08 | 06 | 04 | 02 | 65 | 00 |
| wipe    | 05 | 06 | 08 | 00 | 11 | 03 | 02 | 65 |

(a) cuboid + BoW +  $\chi^2$

|         |    |    |    |    |    |    |    |    |
|---------|----|----|----|----|----|----|----|----|
| call    | 39 | 16 | 04 | 01 | 21 | 17 | 00 | 02 |
| cough   | 08 | 34 | 21 | 09 | 05 | 18 | 04 | 01 |
| drink   | 00 | 23 | 39 | 16 | 03 | 08 | 07 | 04 |
| scratch | 04 | 05 | 07 | 53 | 08 | 09 | 11 | 03 |
| sneeze  | 05 | 13 | 14 | 08 | 48 | 07 | 00 | 05 |
| stretch | 18 | 06 | 00 | 07 | 09 | 59 | 00 | 01 |
| wave    | 07 | 09 | 22 | 00 | 00 | 00 | 61 | 01 |
| wipe    | 00 | 32 | 00 | 02 | 08 | 07 | 08 | 43 |

(b) HOGHOF + BoW +  $\chi^2$

|         |    |    |    |    |    |    |    |    |
|---------|----|----|----|----|----|----|----|----|
| call    | 54 | 02 | 03 | 11 | 06 | 12 | 07 | 05 |
| cough   | 17 | 44 | 04 | 07 | 03 | 09 | 04 | 12 |
| drink   | 07 | 05 | 62 | 06 | 12 | 03 | 05 | 00 |
| scratch | 01 | 04 | 03 | 59 | 11 | 07 | 03 | 12 |
| sneeze  | 12 | 07 | 04 | 06 | 54 | 08 | 02 | 07 |
| stretch | 00 | 16 | 05 | 00 | 01 | 59 | 08 | 11 |
| wave    | 07 | 08 | 10 | 04 | 00 | 05 | 65 | 01 |
| wipe    | 03 | 01 | 04 | 06 | 01 | 03 | 07 | 75 |

(c) cuboid + AMK II

|         |    |    |    |    |    |    |    |    |
|---------|----|----|----|----|----|----|----|----|
| call    | 50 | 06 | 01 | 02 | 11 | 01 | 14 | 15 |
| cough   | 04 | 64 | 00 | 07 | 08 | 10 | 00 | 07 |
| drink   | 12 | 01 | 71 | 00 | 08 | 00 | 07 | 01 |
| scratch | 04 | 05 | 03 | 65 | 02 | 12 | 07 | 02 |
| sneeze  | 14 | 02 | 00 | 12 | 59 | 01 | 04 | 08 |
| stretch | 07 | 08 | 21 | 01 | 12 | 42 | 02 | 07 |
| wave    | 08 | 06 | 00 | 00 | 04 | 00 | 75 | 07 |
| wipe    | 00 | 01 | 11 | 00 | 09 | 08 | 00 | 71 |

(d) HOGHOF + AMK II
