# Supplementary material for: Recognizing flu-like symptoms from videos
Source: Springer Nature journal article supplement (doi:10.1186/1471-2105-15-300), 2014-09-12
Supplement: 12859_2013_6588_MOESM5_ESM.pdf [file 12859_2013_6588_MOESM5_ESM.pdf]

|          |    |    |    |    |    |    |
|----------|----|----|----|----|----|----|
| boxing   | 96 | 00 | 02 | 01 | 00 | 01 |
| hndclap_ | 01 | 94 | 00 | 01 | 00 | 04 |
| hndwav_  | 00 | 01 | 98 | 00 | 01 | 00 |
| jogging  | 04 | 06 | 02 | 76 | 05 | 07 |
| running  | 01 | 04 | 02 | 07 | 75 | 11 |
| walking  | 00 | 03 | 00 | 04 | 02 | 91 |

(a) Cuboid + BoW +  $\chi^2$

|          |    |    |    |    |    |    |
|----------|----|----|----|----|----|----|
| boxing   | 88 | 11 | 01 | 00 | 00 | 00 |
| hndclap_ | 00 | 91 | 04 | 02 | 00 | 03 |
| hndwav_  | 02 | 07 | 89 | 00 | 02 | 00 |
| jogging  | 02 | 01 | 00 | 86 | 05 | 06 |
| running  | 00 | 00 | 00 | 06 | 87 | 07 |
| walking  | 00 | 02 | 01 | 01 | 04 | 92 |

(b) HOGHOF + BoW +  $\chi^2$

|          |    |    |    |    |    |    |
|----------|----|----|----|----|----|----|
| boxing   | 92 | 01 | 04 | 03 | 00 | 00 |
| hndclap_ | 00 | 95 | 00 | 05 | 00 | 00 |
| hndwav_  | 01 | 00 | 96 | 01 | 02 | 00 |
| jogging  | 00 | 01 | 01 | 89 | 05 | 04 |
| running  | 03 | 00 | 00 | 04 | 91 | 02 |
| walking  | 00 | 00 | 00 | 03 | 01 | 96 |

(c) Cuboid + AMK II

|          |    |    |    |    |    |    |
|----------|----|----|----|----|----|----|
| boxing   | 94 | 04 | 01 | 01 | 00 | 00 |
| hndclap_ | 00 | 98 | 01 | 00 | 00 | 01 |
| hndwav_  | 01 | 00 | 97 | 02 | 00 | 00 |
| jogging  | 00 | 02 | 02 | 87 | 06 | 03 |
| running  | 00 | 02 | 00 | 01 | 91 | 06 |
| walking  | 00 | 01 | 00 | 02 | 03 | 94 |

(d) HOGHOF + AMK II
